# Supplementary material for: Conformational changes in twitchin kinase in vivo revealed by FRET imaging of freely moving C. elegans
Source: eLife. 2021 Sep 27;10:e66862. doi: 10.7554/eLife.66862 (PMC8523150; doi:10.7554/eLife.66862)
Supplement: Supplementary file 1. [file elife-66862-supp1.xlsx]

## Sheet: Sheet1
Supplemental Table 1: primers used in this study
Name	Property	Sequence
TwiK-10	SmaI-Fn31-	GCGCCCGGGAATGTCACTGTCGCCGACGTA
TwiK-11	-Ig26-TAA-SalI	CGCGTCGACTTATGGTTCAGAGTGACGGGTAAC
TwiK-13	SmaI-Ig24-	GCGCCCGGGCAAGCATCCGGTTCTGGAGAAGGACCAAAG
TwiK-15	-Ig26-TAA-SalI	CGCGTCGACTTATGGTTCAGAGTGACGGGTAACATTCAAGAA
TwiK-17	SmaI-Fn31-	GCGCCCGGGAATGTCACTGTCGCCGACGTACCTGAACCACCAAGA
TwiK-18	-Ig28-TAA-SalI	CGCGTCGACTTAAAGTGGTTGATCTCCTTTCACTGTCAATGTTGCTCT
TwiK-19	BamHI-NcoI(Kinase)-	GCGGGATCCCCATGGTTGACACCAGGAAAT
TwiK-20	-Ig30-TAA-SalI	CGCGTCGACTTAGACAAGGAGAAGAGCTGC
TwFRET-1	BamHI-BstEII-	GCGGGATCCGGTTACCAACTATACCATTGA
TwFRET-2	-EcoRV-XhoI	CGCCTCGAGGATATCAAAAACGTAGTTGTC
TwFRET-3	Tw Fn-mCitrine (reverse)	CTCCTCGCCCTTGCTCACCATTCCTGATCCTGGAATCAAAACTGGAGC
TwFRET-4	mCitrine-Tw NL (forward)	GCCGCCGGGATCACTCTCGGCTCAGGATATGATGTTGATGAACAA
TwFRET-5	mCitrine-XhoI (reverse)	CGCCTCGAGGCCGAGAGTGATCCCGGCGGC
TwFRET-6	BamHI-BsmBI-NcoI-Fn31-	GCGGGATCCCGTCTCACATGGTCGCCGACGTACCTGAACCA
TwFRET-7	-EcoRV-XhoI	CGCCTCGAGGTAATATTGCTTCCAGATATC
TwFRET-8	BamHI-EcoRV-	GCGGGATCCGACAACTACGTTTTTGATATC
TwFRET-9	-Ig26-stop-KpnI-XhoI	CGCCTCGAGGGTACCTTATGGCTCGAATTTGAGTGGTTC
TwFRET-10	BamHI-ScaI-	GCGGGATCCAGCATAGACCACAAGAGTACT
TwFRET-11	CRD-mCFP (reverse)	CTCCTCGCCCTTGCTCACCATGCCAGAGCCAGCTTCAGATCGATCCCAGAA
TwFRET-12	mCFP-Ig (forward)	GGCATGGACGAGCTGTACAAGGGTTCTGGTCAACCACGATTCATTGTGAAG
TwFRET-13	mCFP-XhoI (reverse)	CGCCTCGAGCTTGTACAGCTCGTCCATGCC
TwFRET-14	end of Ig26 (Forward)	CTCTGAACCACTCAAATTCGAGCCA
TwFRET-15	-BstXI-XhoI (Reverse)	CGCCTCGAGCATCAACTCCCAAGTCATTGG
TwFRET-21	BamHI---EcoRI-	GCGGGATCCGCGGAATTCAAGGAGAGAAGATCT
TwFRET-22	Ig27—mCFP (reverse)	CTCCTCGCCCTTGCTCACCATGCCAGAGCCATTTGTGATCTTTGTCTTGAG
TwFRET-23	mCFP-Ig28 (Forward)	GGCATGGACGAGCTGTACAAGTCTGGTGAACTTCCATCGTTCACAGCT
TwFRET-24	-PstI---SalI	CGCGTCGACGTCCTGCAGAGTTTGAAGCAC
TwFRET-25	BamHI-PstI-Ig28-mCitrine (Forward)	GCGGGATCCCTGCAGGACAAGAACAAACCAGAGCAACATTGACAGTGAAAGGAGATCAAGGCTCTGGCATGGTGAGCAAGGGCGAGGAG
TwFRET-26	mCitrine-Ig29 (Forward)	GCCGCCGGGATCACTCTCGGCTCTGGTCCACTTCTCAATGGACACGCT
TwFRET-27	BamHI-PstI-	GCGGGATCCCTGCAGGACAAGAACAAACCA
