# Supplementary figures and images for: Conformational changes in twitchin kinase in vivo revealed by FRET imaging of freely moving C. elegans
Source: eLife journal article supplement (doi:10.7554/elife.66862), 2021-09-27

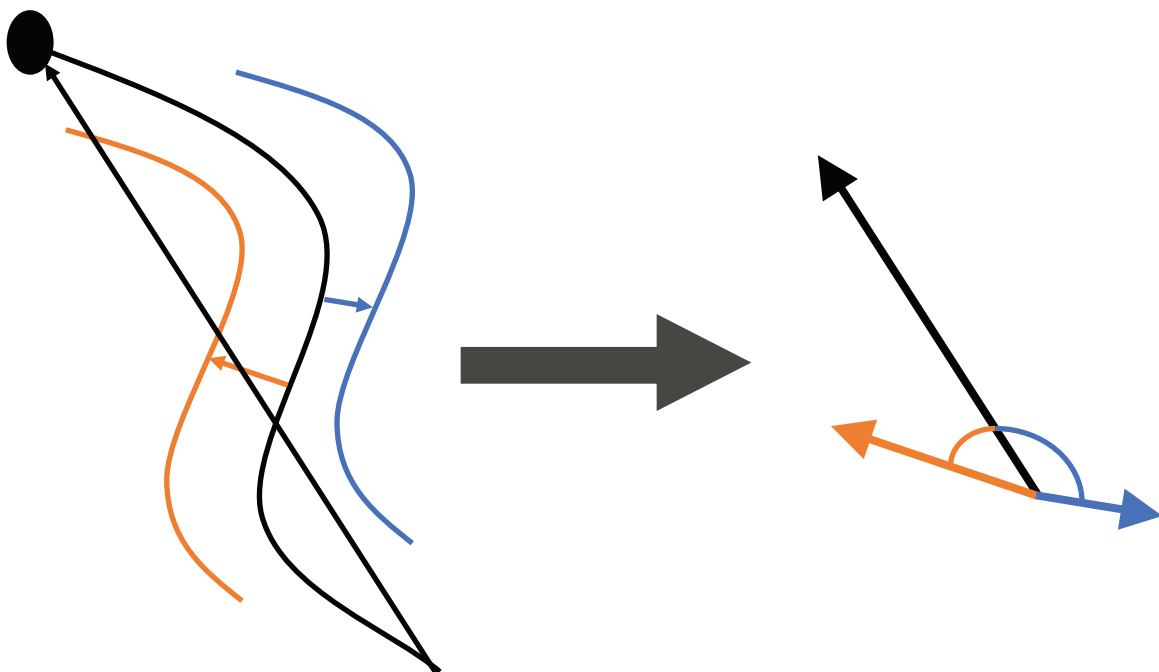

Supplement: supp [file elife_poa_e66862_Figure_3_figure_supplement_1.pdf › elife_poa_e66862_Figure_3_figure_supplement_1.pdf]

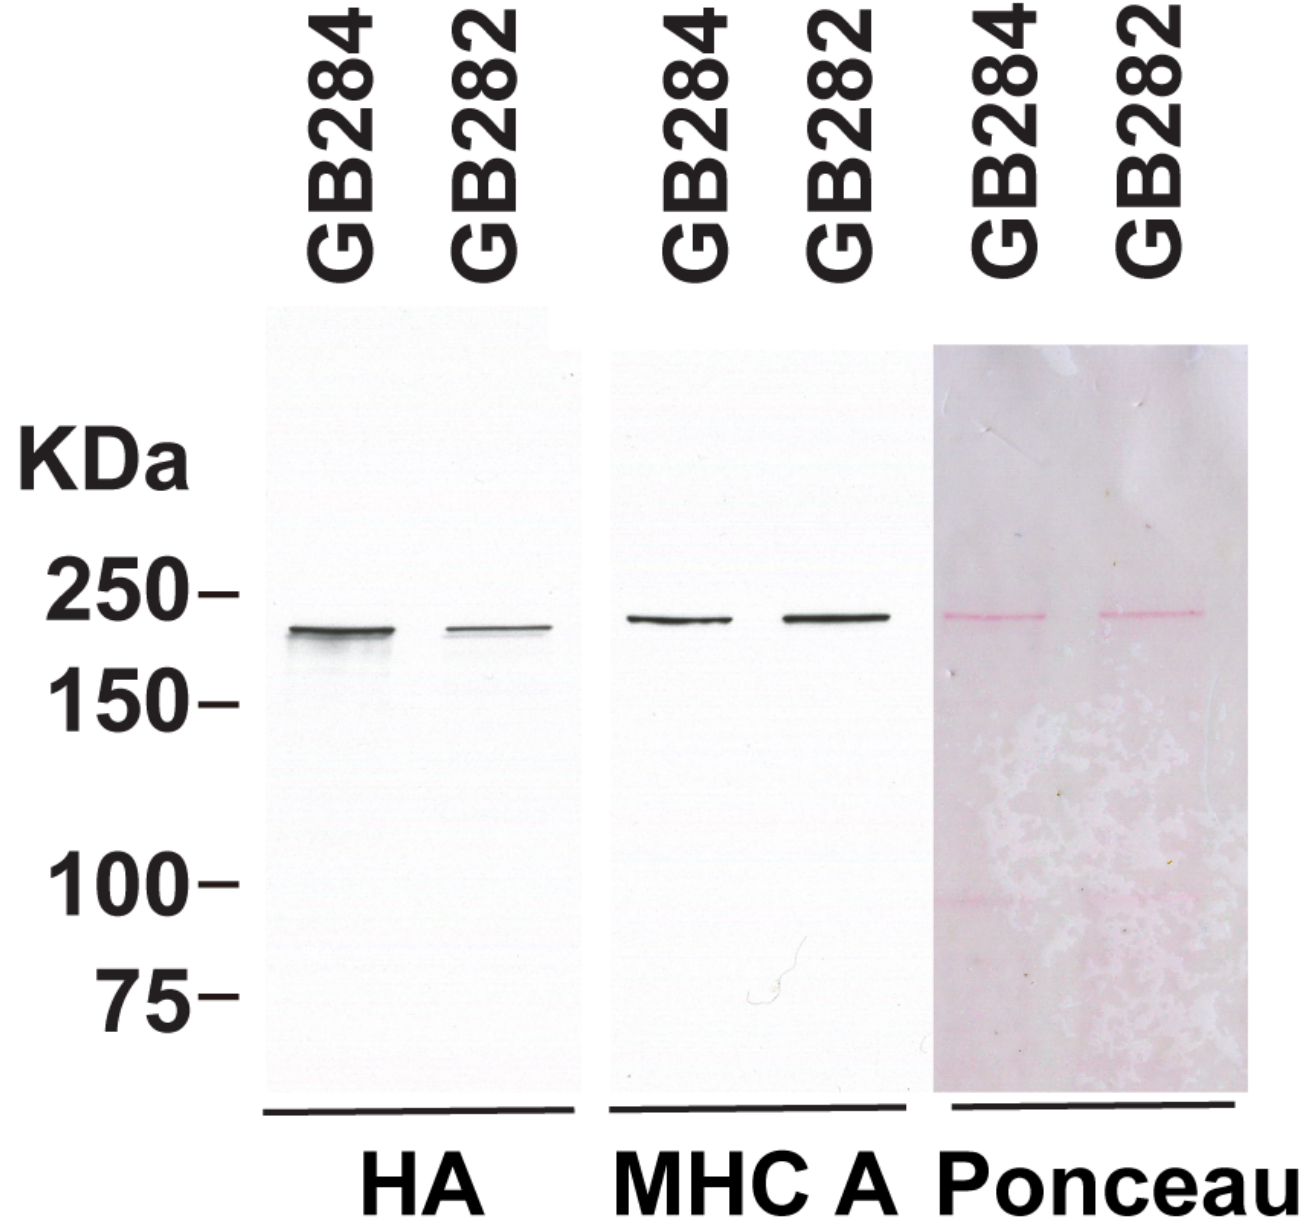

Supplement: supp [file elife_poa_e66862_Figure_5_figure_supplement_1.pdf › elife_poa_e66862_Figure_5_figure_supplement_1.pdf]

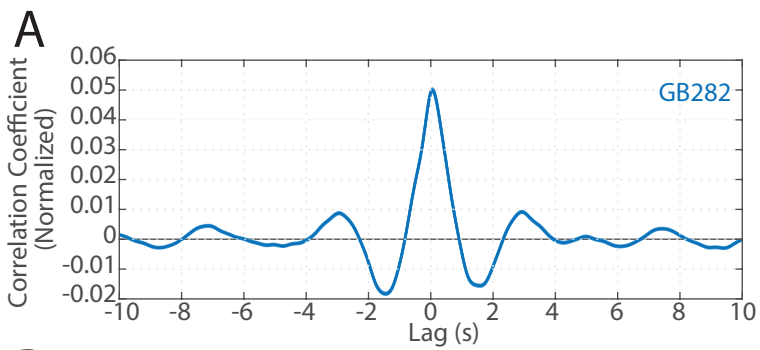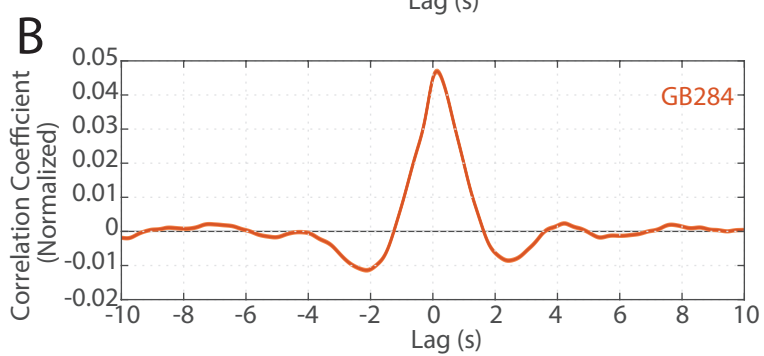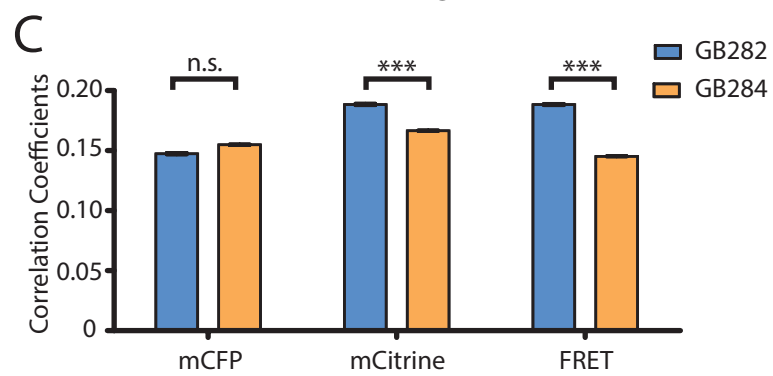

Supplement: supp [file elife_poa_e66862_Figure_5_figure_supplement_2.pdf › elife_poa_e66862_Figure_5_figure_supplement_2.pdf]

A

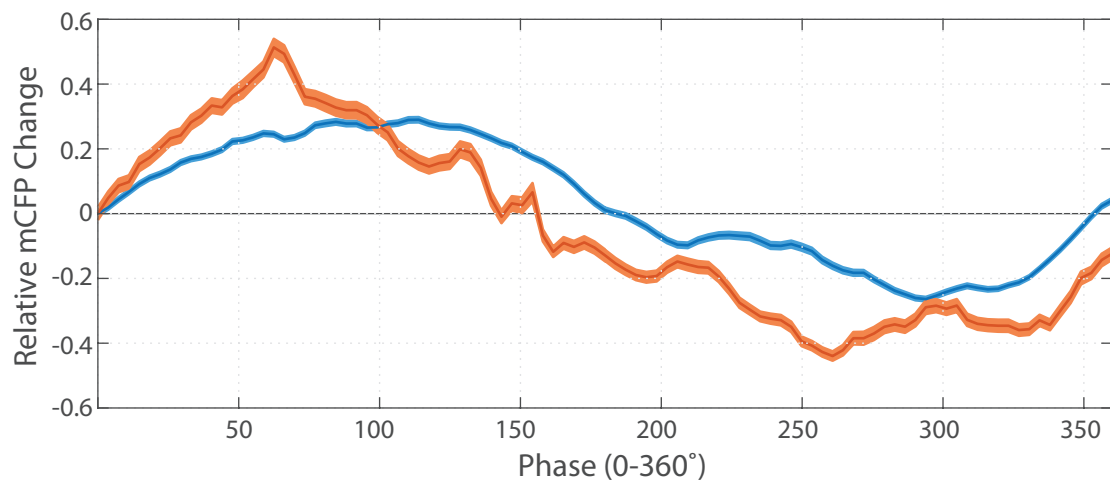

B

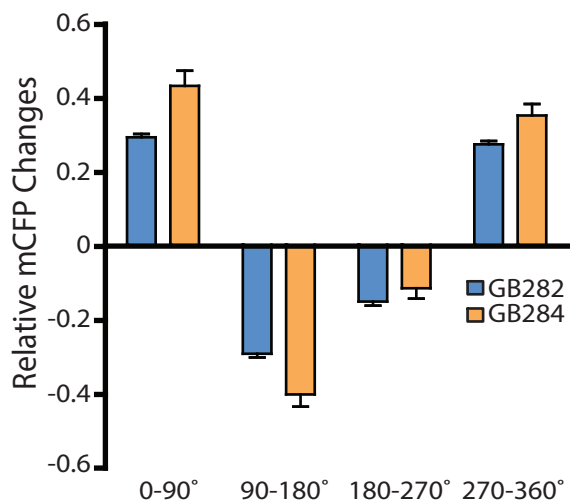

C

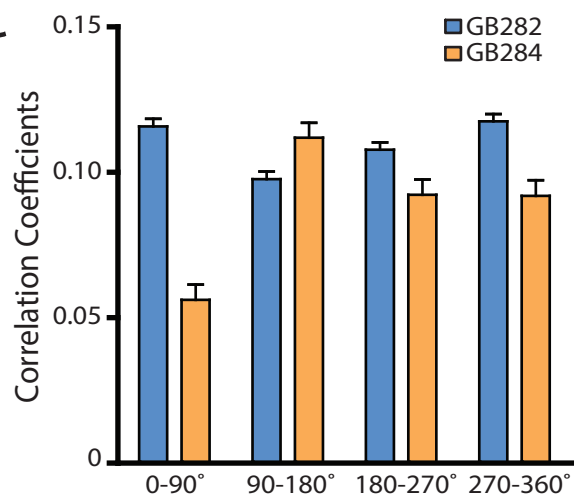

D

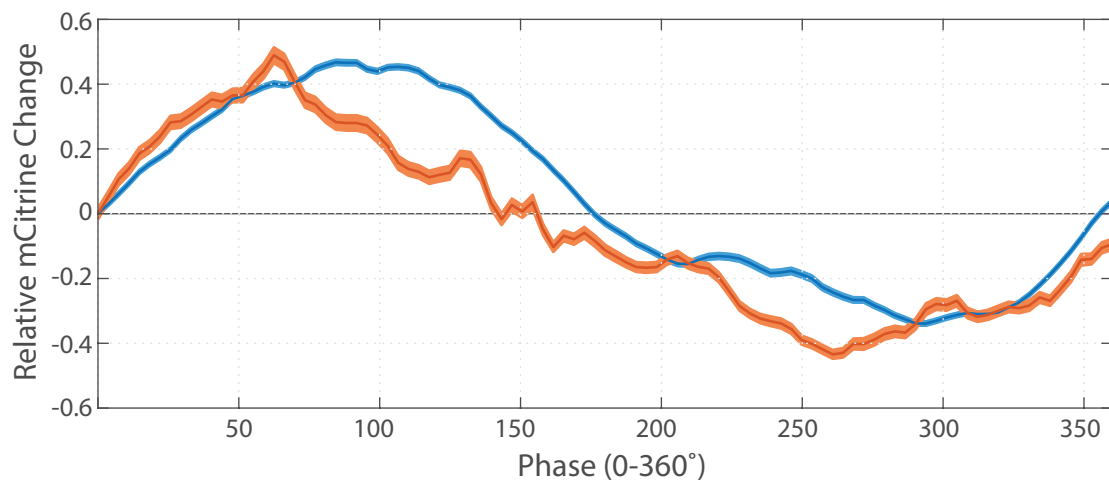

E

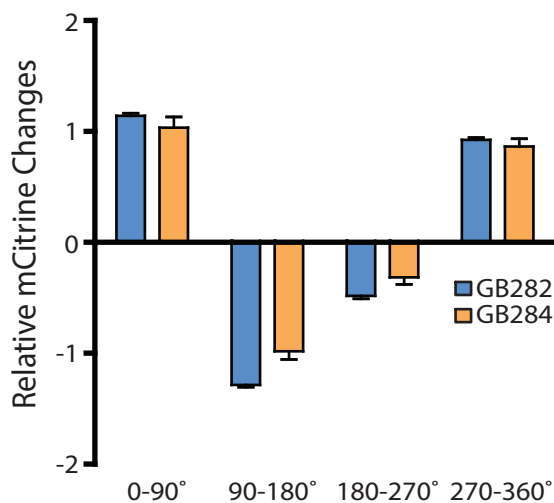

F

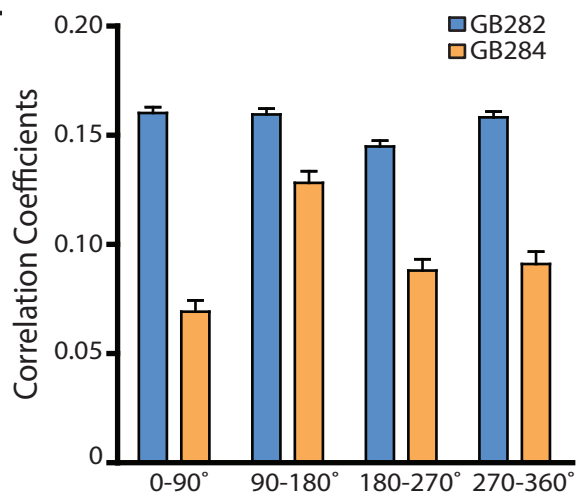

Supplement: supp [file elife_poa_e66862_Figure_6_figure_supplement_1.pdf › elife_poa_e66862_Figure_6_figure_supplement_1.pdf]

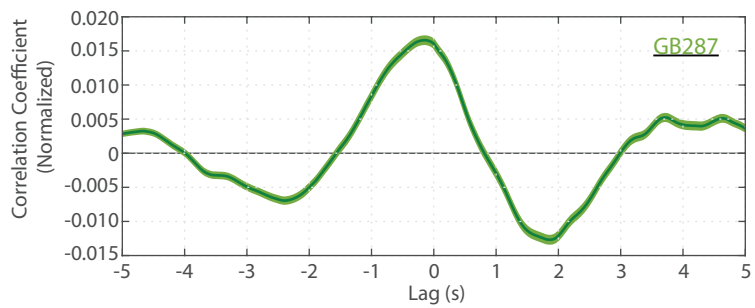

Supplement: supp [file elife_poa_e66862_Figure_7_figure_supplement_1.pdf › elife_poa_e66862_Figure_7_figure_supplement_1.pdf]
